# Supplementary material
Source: PubMed Central journal article supplement (PMC6052797)
Supplement: NIHMS962513-supplement-1.pdf [file NIHMS962513-supplement-1.pdf]

**Table S12**

**Gene blocks used for generating recombinant antibodies, Related to Star Method Details**

Swapped CDR3 and CDR2 regions are in bold font. Italicized sequences denote the overlapping segments used for in-frame infusion cloning.

| construct                                                     | sequence                                                                                                                                                                                                                                                                                                                                                                                                                                                |
|---------------------------------------------------------------|---------------------------------------------------------------------------------------------------------------------------------------------------------------------------------------------------------------------------------------------------------------------------------------------------------------------------------------------------------------------------------------------------------------------------------------------------------|
| CL33 IgH                                                      | AGCAACTGCAACCGGTGTACATTCCGAGGTTGAGCTGCAGCAGTCTGGAGCTGAGCTGGCGAGGCCTGGGGC<br>TTCAGTGAAGCTGTCTGCAAGGCTTCTGGCTACACCTTACAAGCTATGGTATAAGCTGGGTGAAGCAGAGA<br>ACTGGACAGGGCCTTGAGTGGATTGGAGAGATTTATCCTAGAAGTGGTAATACTTACTACAATGAGAAGTTCA<br>AGGGCAAGGCCACACTGACTGCAGACAAATCCTCCAGCACAGCGTACATGGAGCTCCGCAGCCTGACATCTGA<br>GGACTCTGCGGTCTATTTCTGT <b>GCGAGACAAGGGTACTACGCTAATAGTCAGTTACTTACT</b> GGGGCCAAGG<br>GACTCTGGTCACTGTCTCTGCAGCGT <b>CGACCAAGGGCCCA</b>   |
| CL30 IgH                                                      | AGCAACTGCAACCGGTGTACATTCCGAGGTTGAGCTGCAGGAGTCTGGACCTGAGCTGGTGAAGCCTGGGGC<br>TTCAGTGAAGATATCCTGTAAGGCTTCTGGATACACGTTCACTGACTACTACATGAACTGGGTGAAGCAGAGCC<br>ATGGAAAGAGCCTTGAGTGGATTGGAGATATTAATCCTAACAATGGTGGTACTAGCTACAACCAGAAGTTCAA<br>GGGCAAGGCCACATTGACTGTAGACAAGTCTCCAGCACAGCCTACATGGAGCTCCGCAGCCTGACATCTGAG<br>GACTCTGCAGTCTATTACTGT <b>GCAAGATCAGGGAGATGGTTACCGTATGCTATGGACTACT</b> GGGGTCAAGGA<br>ACCTCAGTCACCGTCTCCTCAGCGT <b>CGACCAAGGGCCCA</b> |
| CL33 IgH<br>with CDR-<br>H3 of CL30                           | AGCAACTGCAACCGGTGTACATTCCGAGGTTGAGCTGCAGCAGTCTGGAGCTGAGCTGGCGAGGCCTGGGGC<br>TTCAGTGAAGCTGTCTGCAAGGCTTCTGGCTACACCTTACAAGCTATGGTATAAGCTGGGTGAAGCAGAGA<br>ACTGGACAGGGCCTTGAGTGGATTGGAGAGATTTATCCTAGAAGTGGTAATACTTACTACAATGAGAAGTTCA<br>AGGGCAAGGCCACACTGACTGCAGACAAATCCTCCAGCACAGCGTACATGGAGCTCCGCAGCCTGACATCTGA<br>GGACTCTGCGGTCTATTTCTGT <b>GCAAGATCAGGGAGATGGTTACCGTATGCTATGGACTACT</b> GGGGCCAAGG<br>GACTCTGGTCACTGTCTCTGCAGCGT <b>CGACCAAGGGCCCA</b>  |
| CL30 IgH<br>with CDR-<br>H3 of CL33                           | AGCAACTGCAACCGGTGTACATTCCGAGGTTGAGCTGCAGGAGTCTGGACCTGAGCTGGTGAAGCCTGGGGC<br>TTCAGTGAAGATATCCTGTAAGGCTTCTGGATACACGTTCACTGACTACTACATGAACTGGGTGAAGCAGAGCC<br>ATGGAAAGAGCCTTGAGTGGATTGGAGATATTAATCCTAACAATGGTGGTACTAGCTACAACCAGAAGTTCAA<br>GGGCAAGGCCACATTGACTGTAGACAAGTCTCCAGCACAGCCTACATGGAGCTCCGCAGCCTGACATCTGAG<br>GACTCTGCAGTCTATTACTGT <b>GCGAGACAAGGGTACTACGCTAATAGTCAGTTACTTACT</b> GGGGTCAAGGAA<br>CCTCAGTCACCGTCTCCTCAGCGT <b>CGACCAAGGGCCCA</b>  |
| CL33 IgH<br>with CDR-<br>H3 of anti-<br>ovalbumin<br>antibody | AGCAACTGCAACCGGTGTACATTCCGAGGTTGAGCTGCAGCAGTCTGGAGCTGAGCTGGCGAGGCCTGGGGC<br>TTCAGTGAAGCTGTCTGCAAGGCTTCTGGCTACACCTTACAAGCTATGGTATAAGCTGGGTGAAGCAGAGA<br>ACTGGACAGGGCCTTGAGTGGATTGGAGAGATTTATCCTAGAAGTGGTAATACTTACTACAATGAGAAGTTCA<br>AGGGCAAGGCCACACTGACTGCAGACAAATCCTCCAGCACAGCGTACATGGAGCTCCGCAGCCTGACATCTGA<br>GGACTCTGCGGTCTATTTCTGT <b>TTCAAGCTGGGCATGACCTTCGACATCTGGGGCCAGGGCT</b> GGGGCCAAGG<br>GACTCTGGTCACTGTCTCTGCAGCGT <b>CGACCAAGGGCCCA</b>  |
| CL33 IgH<br>with CDR-<br>H2 of CL30                           | AGCAACTGCAACCGGTGTACATTCCGAGGTTGAGCTGCAGCAGTCTGGAGCTGAGCTGGCGAGGCCTGGGGC<br>TTCAGTGAAGCTGTCTGCAAGGCTTCTGGCTACACCTTACAAGCTATGGTATAAGCTGGGTGAAGCAGAGA<br>ACTGGACAGGGCCTTGAGTGGATTGGAGAGATTAATCCTAACAATGGTGGTACTTACTACAATGAGAAGTTCA<br>AAGGGCAAGGCCACACTGACTGCAGACAAATCCTCCAGCACAGCGTACATGGAGCTCCGCAGCCTGACATCTG<br>AGGACTCTGCGGTCTATTTCTGTGCGAGACAAGGGTACTACGCTAATAGTCAGTTTACTTACTGGGGCCAAGG<br>GACTCTGGTCACTGTCTCTGCAGCGT <b>CGACCAAGGGCCCA</b>          |
| CL30 IgH<br>with CDR-<br>H2 of CL33                           | AGCAACTGCAACCGGTGTACATTCCGAGGTTGAGCTGCAGGAGTCTGGACCTGAGCTGGTGAAGCCTGGGGC<br>TTCAGTGAAGATATCCTGTAAGGCTTCTGGATACACGTTCACTGACTACTACATGAACTGGGTGAAGCAGAGCC<br>ATGGAAAGAGCCTTGAGTGGATTGGAGATATTTATCCTAGAAGTGGTAATACTAGCTACAACCAGAAGTTCAA<br>GGGCAAGGCCACATTGACTGTAGACAAGTCTCCAGCACAGCCTACATGGAGCTCCGCAGCCTGACATCTGAG<br>GACTCTGCAGTCTATTACTGTGCAAGATCAGGGAGATGGTTACCGTATGCTATGGACTACTGGGGTCAAGGAA<br>CCTCAGTCACCGTCTCCTCAGCGT <b>CGACCAAGGGCCCA</b>          |
| CL33 Igk                                                      | AGCAACTGCAACCGGTGTACATTCCGATATCCAGATGACACAGACTACATCCTCCCTGTCTGCCTCTCTGGGAG<br>ACAGAGTCACCATCAGTTGCAGTGAAGTCAGGGCATTAGCAATTTAACTGGTATCAGCAGAAACCAGA<br>TGGAAGTGTAACTCCTGATCTATTACACATCAAGTTTACTCAGGAGTCCCATCAAGGTTCACTGGCAGTG<br>GGTCTGGGACAGATTATTCTCTACCATCAGCAACTGGAACCTGAAGATATTGCCACTTACTATTGTGAGCAG<br>TATAGTAAGCTTCCGTGGACGTTCCGGTGGAGGCACCAACTGGAAATCAAACGTACGGTGGCTGCAC                                                                         |
| CL30 Igk                                                      | AGCAACTGCAACCGGTGTACATTCCAACATTATGATGACACAGTCGCCATCATCTCTGGCTGTGTCTGCAGGAG<br>AAAAGGTCATATGAGCTGTAAGTCCAGTCAAAGTGTTTTATACAGTTCAAATCAGAAGAACTACTTGGCCTGG                                                                                                                                                                                                                                                                                                 |

|                                                                                                                                                                                                                                                           |
|-----------------------------------------------------------------------------------------------------------------------------------------------------------------------------------------------------------------------------------------------------------|
| TACCAGCAGAAACCAGGGCAGTCTCCTAAACTGCTGATCTACTGGGCATCCACTAGGGAATCTGGTGTCCCTG<br>ATCGCTTCACAGGCAGTGGATCTGGGACAGATTTTACTCTTACCATCAGCAGTGTACAAGCTGAAGACCTGGCA<br>GTTTATTACTGTCATCAATACCTCTCCTCGCTCACGTTCCGGTGCTGGGACCAAGCTGGAGCTGAAACGTACGGT<br><i>GGCTGCAC</i> |
|-----------------------------------------------------------------------------------------------------------------------------------------------------------------------------------------------------------------------------------------------------------|
